# Supplementary material
Source: publisher site journal article supplement (https://www.dovepress.com/article/275783)
Supplement: Supplementary file 1 [file get_supplementary_file.php]

| **Author** | **Study type** | **Age (years)** | **Gender** | **Race** | **Medical history** | **Social history** | **Drug type** | **Drug name** | **Drug dosage** | **Duration of drug intake** | **Pigmentation location** | **Pigmentation color** | **Pigmentation size** | **Cutaneous involvement** | **Dental pigmentation** | **Bone pigmentation** |
| --- | --- | --- | --- | --- | --- | --- | --- | --- | --- | --- | --- | --- | --- | --- | --- | --- |
| Ayangco44, 2003 | Case report  **Supplementary table 1. A characteristic of 57 studies included in the systemic review** | 29 | female | White | acne | NA | antibiotic | minocycline | 50 mg QID | 17 months | hard palate (torus palatinus) and alveolar ridge | bluish | striking 3 × 1.5 mm, diffuse | no | no | no |
| Balaji 38, 2014 | Case report | 10 | male | NA | None | no | antibiotic | linezolid | 600 mg twice daily | 2 weeks | tongue | black to brown | diffuse | no | no | no |
| Beehner34, 1986 | Case report | 15 | female | White | acne and unilateral obstruction at the ureteropelvic junction level | no | antibiotic | minocycline | 50 mg QID | unknown | junction of attached and free gingiva | bluish grey | diffuse | no | no | yes |
| Buddula37, 2009 | Case report | 91 | female | White | three-part intertrochanteric femur fracture | no | antibiotic | minocycline | 100 mg BID | 3.5 years | hard palate (torus palatinus) | blue | 2.5 × 2 cm | no | no | no |
| Cale29, 1988 | Case report | 33 | male | White | acne vulgaris | no | antibiotic | minocycline | NA | 6 years | attached gingiva near the mucogingival junction | blue-grey | 3 mm wide | no | yes | yes |
| Fendrich12, 1984 | Case report | 25 | male | White | None | NA | antibiotic | minocycline | NA | 10 years | attached gingiva near the mucogingival junction, bilateral mandibular tori | blue-grey | diffuse | no | yes | yes |
| Johnston13, 2013 | Case report | 51 | female | NA | hypertension, asthma, acne, and rosacea | NA | antibiotic | minocycline | NA | 20 years | oral mucosa above the mucogingival margin | bluish | diffuse | yes | no | no |
| Langford64, 1989 | Case reports | 29 | female | NA | HIV | smoking and IV drug abuse | antibiotic | clindamycin & spiramycin, & pyrimethamine | unknown | 4 weeks | tongue & buccal mucosa | brown-black | spots or striations | no | no | no |
| LaPorta65, 2005 | Case report | 45 | female | Caucasian | hypertension | Smoking | antibiotic | minocycline | 100 mg BID | 6 months | marginal anterior gingiva, labial mucosa | brown | diffuse | yes | no | no |
| Meyerson4, 1995 | Case reports | 61 | female | Hispanic | acne rosacea and hypertension | no | antibiotic | minocycline | 50 mg twice daily | 4 weeks | tongue | purple black | multiple linear | no | no | no |
| 25 | female | Asian | acne | no | 100-150 mg/day | 6 months | tongue | purple black | 8 × 4 mm | no | no | no |
| Morrow30, 1998 | Case report | 55 | female | NA | hypertension, hypercholesterolemia, hypothyroidism, depression, and acne | NA | antibiotic | minocycline | 100 mg BID | 20 years | hard palate | blue-grey | NA | yes | yes | no |
| Odell27, 1995 | Case report | 25 | female | NA | acne vulgaris | NA | antibiotic | minocycline | 100 mg/day | 11 years | alveolar mucosa & hard palate | grey | diffuse band | no | no | yes |
| Ozog28, 2000 | Cohort | 67 | female | NA | PV | no | antibiotic | minocycline | 100 mg BID | 1.5 month | mucosal pigmentation along the alveolar ridge | slate grey | diffuse | yes | no | no |
| 48 | female | NA | PV | no | antibiotic | minocycline | 101 mg BID | 12 months | mouth | pale grey | unknown | yes | no | no |
| 19 | female | NA | PV | no | antibiotic | minocycline | 102 mg BID | 3 months | mouth | pale grey | unknown | yes | no | no |
| 33 | male | NA | PV | no | antibiotic | minocycline | 103 mg BID | 25 months | mouth | pale grey | unknown | yes | no | no |
| Patel23, 1998 | Case report | 46 | male | NA | facial acne | no | antibiotic | minocycline then doxycycline and then isotretinoin | unknown | 3 years 4 years | buccal and lingual attached gingivae | purple grey | diffuse | yes | yes | no |
| Salman19, 1985 | Case report | 29 | female | White | acne vulgaris | no | antibiotic | minocycline | 50 mg BID | 5 years | mucogingival junction into the alveolar mucosa | blue-grey | diffuse | no | yes | yes |
| Siller17, 1994 | Case reports | 22 | female | white | acne | no | antibiotic | minocycline | 100 mg BID | 11 months | attached gingiva and alveolar mucosa | blue-grey | band | no | no | yes |
| 19 | female | white | cystic acne | no | antibiotic | minocycline | 100 mg/day | 3 years | alveolar mucosa and central area of palatal vault | blue-black | band 5 mm in width | no | yes | yes |
| Tosios18, 2017 | Case reports | 55 | female | White | cystic acne | smoking | antibiotic | minocycline | 200 mg/d | 8 months | gingiva | pale brown with black spot | multifocal | no | no | no |
| Treister15, 2004 | Case reports | 43 | male | NA | acne rosacea, depression, and bipolar disorder |  | antibiotic | minocycline | unknown | unknown | hard palate | brownish-black | diffuse | no | no | no |
| 49 | male | NA | acne rosacea |  | antibiotic | minocycline | unknown | unknown | hard palate | black | unknown | no | no | no |
| Bahloul39, 2017 | Cross sectional | 39.2-15.4 | 38 f, 3 m | NA | SLE | no | antimalarial | hydroxychloroquine | 585 g | 6-108 months | lip, gum | brown black | 2-7 cm | no | no | no |
| Birek35, 1988 | Case reports | 58 | female | White | mitral stenosis & ventricular and supraventricular arrythmias | no | antimalarial | quinidine sulfate | 4x100 mg/day | 10 years | hard palate | bluish-black | diffuse | yes | no | no |
| 75 | male | White | long standing calcific aortic and mitral disease | no | antimalarial | quinidine sulfate | 3X 100 mg daily to 8X 200 mg daily | 5 years | hard palate (maxillary torus) | bluish-black | diffuse | no | no | no |
| Chacon-Dulcey60, 2020 | Cohort | 16-79 | 1 male, 9 female | NA | SLE | NA | antimalarial | chloroquine & hydroxychloroquine | 250 mg/day &200 mg/day | 16 years | hard palate, buccal mucosa & tongue | brown-black | macules | no | no | no |
| Deandrade 33, 2013 | Case reports | 52 | female | NA | RA | No | antimalarial | chloroquine diphosphate | 250 mg/day | 4 years | hard palate | blue-grey | 5 cm diffuse | no | no | no |
| 59 | male | NA | RA | smoking | antimalarial | chloroquine diphosphate | unknown | 10 years | hard palate | blue-grey | diffuse | no | no | no |
| 83 | female | NA | breast cancer and RA | no | antimalarial | chloroquine diphosphate | 252 mg/day | 3 years | hard palate | dark-grey | diffuse | no | no | no |
| 60 | male | NA | RA | no | antimalarial | chloroquine diphosphate | 253 mg/day | 12 years | hard palate | dark | diffuse | no | no | no |
| 65 | female | NA | RA | no | antimalarial | chloroquine diphosphate | 254 mg/day | 3 years | hard palate | blue-grey | diffuse | no | no | no |
| deAndrade 45, 2017 | Case report | 60 | female | Mexican | RA | no | antimalarial | chloroquine diphosphate | 150 mg/day | 1 year | hard palate | blue-grey | diffuse 4 cm | no | no | no |
| Kleinegger 66, 2000 | Case report | 34 | m | NA | sensitivity to the sun | smoking | antimalarial | quinacrine hydrochloride | unknown | 10 years | hard palate | blue-grey | diffuse | yes | no | no |
| Lerman63, 2009 | Case report | 57 | female | African American | DLE | no | antimalarial | quinacrine hydrochloride | unknown | unknown | hard palate | slate-black | diffuse, large | yes | no | no |
| Levy32, 1982 | Case reports | 19 | male | White | None | NA | antimalarial | Daraclor | 2 tablets/week then 4 tablets/ week | 5 months then 1 month | gingiva &vermilion of the lip | blue | diffuse | yes | no | no |
| 21 | male | White | None | NA | antimalarial | Daraclor | 2/week | 3 and half month | gingiva | blue | diffuse | yes | no | no |
| López Jornet47, 2011 | Case report | 50 | female | Caucasian | subacute lupus erythematous | unknown | antimalarial | quinacrine hydrochloride | unknown | 6 months | hard palate | dark-blue | diffuse | no | no | no |
| Mahler41, 1986 | Case report | 83 | male | NA | MI, bronchitis, and thalassemia minor | no | antimalarial | quinidine sulfate | 600 mg QID | 9 years | hard palate | bluish-grey | diffuse | yes | no | no |
| MeloFilho31  , 2012 | Case report | 64 | female | black | arterial hypertension and RA | no | antimalarial | chloroquine diphosphate | 200 mg/day | 15 years | hard palate, dorsal tongue, and left lower gingival border | black-grey, black-grey, | diffuse 4 cm area, spots | no | no | no |
| Tosios18, 2017 | Case reports | 53 | female | White | RA & hypertension | no | antimalarial | hydroxychloroquine | 400 mg/d | 5 years | hard palate & attached gingiva | blue-brown & brown | diffuse & small | no | no | no |
| Watson42, 1974 | Case report | 34 | female | NA | SLE and Sjogren's disease | NA | antimalarial | amodiaquine | NA | 8 years, frequent | hard palate | blue-black | diffuse | yes | no | no |
| Bombeccari36, 2017 | Case report | 63 | male | Caucasian | hypertension, hyperlipidemia, and CML | no | antineoplastic | imatinib | 400 mg/day | 9 years | hard palate | grey–blue | diffuse | no | no | no |
| Di Tullio49,  2018 | Case report | 47 | male | Caucasian | CML/ DM | no | antineoplastic | Imatinib | 400–800 mg/day | 14 years | hard palate | blue-grey | diffuse | yes | no | no |
| Dixon & Yassin58, 2017 | Case report | 57 | male | NA | CML | NA | antineoplastic | Imatinib | 400 mg daily | >10 years | hard palate | grey | diffuse | no | no | no |
| Khoo52, 2012 | Case report | 58 | female | Caucasian | CML | no | antineoplastic | Imatinib | 400 mg/d | 5 years | hard palate | greyish | diffuse | no | no | no |
| Kumar11, 2001 | Cohort | 24-75 | 24 m, 6 f | Indian | chronic plaque psoriasis | NA | antineoplastic | hydroxyurea | 1.0-1.5 g/day | 9 weeks | tongue | greyish | streaks | no | no | no |
| Lewis55, 2009 | Case report | 70 | male | Caucasian | CML | NA | antineoplastic | Imatinib | unknown | 3 years | hard palate | grey | diffuse | no | no | no |
| Li54, 2012 | Case reports | 64 | male | Caucasian | CML | no | antineoplastic | imatinib | 400 mg/day | 4 years | hard palate | grey-blue | diffuse | no | no | no |
| 53 | male | Caucasian | CML, hyperlipidemia, HTN, DM, and allergic rhinitis | no | antineoplastic | imatinib | 400 mg/day | 10 years | hard palate | grey-blue | diffuse | no | no | no |
| 29 | female | Caucasian | pelvic fibromatosis, DVT, and iron deficiency anemia | no | antineoplastic | imatinib | 400 mg/day | 4 years | hard palate | blue-black | diffuse | no | no | no |
| Lyne21, 2015 | Case report | 58 | female | Caucasian | CML | alcohol | antineoplastic | imatinib | 400-600 mg/daily | 13 years | hard palatal mucosa | bluish | diffuse | no | no | no |
| Mascitt62, ,2019 | Case report | 78 | male | NA | CML | non-smokers | antineoplastic | Imatinib | 400 mg daily | 4 years | hard palate | blue | symmetric diffuse | no | no | no |
| Mattsson48, 2011 | Case reports | 66 | female | NA | Leiomyoblastoma | no | antineoplastic | imatinib | 400 mg daily | 5 years | hard palate | bluish-brown | diffuse | no | no | no |
| 66 | female | NA | CML | no | antineoplastic | imatinib | 400 mg daily | 5 years | hard palate | dark-brown | diffuse | no | no | no |
| 64 | female | NA | CML | no | antineoplastic | imatinib | 400 mg daily | 5 years | hard palate | bluish brown | diffuse | no | no | no |
| Oliveira59, 2019 | Cross-sectional study | 19-80 | 41 male, 33 female | Caucasian  & Black | CML | mostly non-smokers | antineoplastic | Imatinib | 300-800 mg/day | 3 month-6 years | hard palate | grey | diffuse | yes | no | no |
| Resend24, 2012 | Case report | 38 | male | white | CML, ALL, and neurofibromatosis type 1 | no | antineoplastic | imatinib | unknown | 5 years, stop 100 days | hard palate | blue | large, diffuse | yes | no | no |
| Roeker & Wolanskyi51, 2014 | Case report | 65 | female | NA | CML | NA | antineoplastic | Imatinib | unknown | 6 years | hard palate | grey | diffuse | no | no | no |
| Romeo22, 2015 | Case report | 72 | female | Spanish | GERD, diuresis, and CML | None | antineoplastic | Imatinib | 400 mg/day | 11 years | hard palate | blue-grey | diffuse | no | no | no |
| singh & Bakhsk53, 2007 | Case report | 13 | female | NA | CML | NA | antineoplastic | Imatinib | 300 mg/d | 4 months | gingiva | brown | diffuse | no | yes | no |
| Song & Kang50, 2014 | Case report | 58 | male | NA | CML | NA | antineoplastic | Imatinib | unknown | 4 weeks | hard palate | slate grey | Diffuse | yes | no | no |
| Steele57, 2012 | Case report | 48 | male | White | CML | no | antineoplastic | Imatinib | 400 mg/d | 9 years | hard palate & tonsils | grey |  | no | no | no |
| Tosios18, 2017 | Case reports | 61 | male | white | CML | no | antineoplastic | Imatinib | 400 mg/d | 11 year | hard palate | grey-black | diffuse | no | no | no |
| Wong46, 2011 | Case report | 43 | female | NA | CML | no | antineoplastic | imatinib | unknown | 3 months | hard palate | slate-grey | diffuse | no | no | no |
| Acharya40, 2017 | Cohort | 27–66 years | female  (n=26) | NA | NA | NA | chemotherapy | cyclophosphamide & adriamycin | 600 mg/m2 and 60 mg/m2 | 12 weeks | tongue | NA | NA | NA | no | no |
| Lawrenz Co43, 2017 | Case report | 76 | female | Black | metastatic colon cancer, AML, DVT hypertension, CKD, and osteoarthritis | NA | chemotherapy | 5-fluorouracil, bevacizumab and leucovorin | unknown | second cycle (unknown) | tongue | black to brown | papules, multiple | no | no | no |
| Nestor26, 2016 | Case report | 62 | female | Caucasian | stage 4 colorectal carcinoma | no | chemotherapy | irinotecan | unknown | 1 year | dorsum of the tongue and hard palate | brown | multiple, diffuse | yes | no | no |
| Parvaei25, 2015 | Case report | 57 | female | NA | breast cancer | no | chemotherapy | cyclophosphamide, doxorubicin, and fluorouracil | unknown | unknown | tongue, lips, palate, and buccal mucosa | dark grey-black, dark-brown | multiple, diffuse various sizes | no | no | no |
| Vasudevan 16, 2010 | Case report | 59 | male | NA | Stomach adenocarcinoma | NA | chemotherapy | capecitabine | 2 g/BID | 1 month | dorsum of the tongue | NA | spots | yes | no | no |
| Ficarra5, 1990 | Cohort | 37 | male | NA | HIV | no | antiviral | zidovudine | unknown | unknown | lip | melanotic macule | unknown | no | no | no |
| 24 | female | NA | HIV | no | antiviral | zidovudine | unknown | unknown | buccal mucosa | melanotic macule | unknown | no | no | no |
| 33 | male | NA | HIV | no | antiviral | zidovudine | unknown | unknown | buccal mucosa | melanotic macule | unknown | no | no | no |
| 31 | male | NA | HIV | no | antiviral | zidovudine | unknown | unknown | lip | melanotic macule | unknown | no | no | no |
| 44 | male | NA | HIV | no | antiviral | zidovudine | unknown | unknown | buccal mucosa | melanotic macule | unknown | no | no | no |
| 22 | female | NA | HIV | no | antiviral | zidovudine | unknown | unknown | buccal mucosa & gingiva | melanotic macule | unknown | no | no | no |
| 24 | male | NA | HIV | no | antiviral | zidovudine | unknown | unknown | buccal mucosa | melanotic macule | unknown | no | no | no |
| 47 | female | NA | HIV | no | antiviral | zidovudine | unknown | unknown | buccal mucosa | melanotic macule | unknown | no | no | no |
| 23 | female | NA | HIV | no | antiviral | zidovudine | unknown | unknown | buccal mucosa | melanotic macule | unknown | no | no | no |
| 34 | male | NA | HIV | no | antiviral | zidovudine | unknown | unknown | buccal mucosa | melanotic macule | unknown | no | no | no |
| 32 | male | NA | HIV | no | antiviral | zidovudine | unknown | unknown | buccal mucosa | melanotic macule | unknown | no | no | no |
| 27 | male | NA | HIV | no | antiviral | zidovudine | unknown | unknown | buccal mucosa & lip | melanotic macule | unknown | no | no | no |
| 27 | male | NA | HIV | no | antiviral | zidovudine | unknown | unknown | buccal mucosa | melanotic macule | unknown | no | no | no |
| 26 | male | NA | HIV | no | antiviral | zidovudine | unknown | unknown | buccal mucosa | melanotic macule | unknown | no | no | no |
| Beacher56, 2015 | Case report | 70 | male | NA | seizure | NA | antiepileptic | retigabine | 300 mg/d | 2 years | hard palate | purple/blue | symmetric diffuse | yes | no | No |
| Erbagci14, 2004 | Case report | 45 | male | Caucasian | Fitzpatrick’s skin type III and chronic gastritis | NA | anti-hypertensive | amlodipine | 10 mg/day | 3 years | tongue, hard palate | blue-grey, brown | patches, pinpoint | yes | no | no |
| Perusse20, 1991 | Case report | 50 | female | White | Hashimoto's thyroiditis and pernicious anaemia | no | hormonal therapy | Premarin | 1.25 mg | 40 months | labial mucosa, floor of the mouth, and buccal mucosa | dark brown | multiple macules | no | no | No |
| Langford64, 1989 | Case reports | 36 | male | NA | HIV | no | antileprotic | clofazimine | 300 mg/week | 8 weeks | buccal mucosa | brown-black | spots or striations | no | no | no |
| 47 | male | NA | HIV | no | antifungal | ketoconazole | 400 mg/ day | 3 months | buccal mucosa | brown-black | spots or striations | no | no | no |
| 29 | male | NA | HIV | no | immuno-suppressant | corticosteroids | 50 mg/day | unknown | buccal mucosa | brown-black | spots or striations | yes | no | no |
| Tosios18, 2017 | Case reports | 67 | female | White | RA & Hashimoto’s disease, HTN, and SLE | smoking | immune-suppressant | golimumab | 50 mg/month | 6 years | buccal mucosa, hard palate, and upper lip | dark to light brown | 0.3 to 0.5 cm | no | no | no |

Gender: M= male, F= female; Medical history: ALL= Acute lymphoblastic leukemia, AML= Acute myeloid leukemia, CKD= Chronic kidney disease, CML= Chronic myeloid leukemia, DLE= Discoid lupus erythematosus, DM= diabetes mellitus, DVT= Deep vein thrombosis, HIV= human immunodeficiency virus, HTN= Hypertension, GERD= Gastroesophageal reflux disease, MI= myocardial infarction, PV= Pemphigus vulgaris, RA= RA, SLE= Systemic lupus erythematosus; Drug’s dose: BID= two times a day, QID= four times a day.

**Quality assessment of included studies**

**Supplementary table (2) shows quality assessment results for included case reports and series**

| **Study ID** | **Selection** | **Ascertainment** | | **Causality** | | | | **Reporting** |
| --- | --- | --- | --- | --- | --- | --- | --- | --- |
| Does the patient(s) represent(s) the whole experience of the investigator (centre) or is the selection method unclear to the extent that other patients with similar presentation may not have been reported? | Was the exposure adequately ascertained? | Was the outcome adequately ascertained? | Were other alternative causes that may explain the observation ruled out? | Was there a challenge/re-challenge phenomenon? | Was there a dose–response effect? | Was follow-up long enough for outcomes to occur? | Is the case(s) described with sufficient details to allow other investigators to replicate the research or to allow practitioners make  inferences related to their own practice? |
| **Ayangco44 ,2003** | Yes | Yes | Yes | Yes | Unclear | Unclear | No | Yes |
| **Balaji38 ,2014** | Yes | Yes | Yes | Yes | No | No | No | Yes |
| **Beehner34 ,1986** | Yes | Yes | Yes | Yes | Unclear | Unclear | Unclear | Yes |
| **Beacher56 ,2015** | Yes | Yes | Yes | Yes | Unclear | Yes | Yes | Yes |
| **Birek35 ,1988** | Yes | Yes | Yes | Yes | Unclear | Unclear | Yes | Yes |
| **Bombeccari36 ,2017** | Yes | Yes | Yes | Yes | Yes | Yes | Yes | Yes |
| **Buddula37 ,2009** | Yes | Yes | Yes | Unclear | No | No | Unclear | Yes |
| **Cale29 ,1988** | Yes | Yes | Yes | Yes | Unclear | Unclear | Yes | Yes |
| **De Andrade33 ,2013** | Yes | Yes | Yes | Yes | Yes | Yes | Yes | Yes |
| **De Andrade45 ,2017** | Yes | Yes | Yes | Unclear | Unclear | Unclear | No | Yes |
| **Dixon58 ,2017** | Unclear | Yes | Yes | Yes | Unclear | Yes | Yes | Yes |
| **Erbagci14, 2004** | Yes | Yes | Yes | Yes | Yes | Yes | Yes | Yes |
| **Fendrich12, 1984** | Yes | Yes | Yes | Unclear | Unclear | Unclear | Unclear | Yes |
| **Johnston13, 2013** | Yes | Yes | Yes | Unclear | Unclear | Unclear | Unclear | Yes |
| **Khoo52, 2013** | Yes | Yes | Yes | Yes | Unclear | Yes | Yes | Yes |
| **Kleinegger66, 2000** | Yes | Yes | Yes | Yes | Unclear | Unclear | Yes | Yes |
| **Langford64, 1989** | Yes | Yes | Yes | Yes | Unclear | Unclear | Yes | Yes |
| **LaPorta65, 2005** | Yes | Yes | Yes | Yes | Yes | Yes | Yes | Yes |
| **Lawrenz Co43, 2017** | Yes | Yes | Yes | Yes | Yes | Yes | Yes | Yes |
| **Lerman63, 2009** | Yes | Yes | Yes | Yes | Unclear | Unclear | Unclear | Yes |
| **Levy32, 1982** | Yes | Yes | Yes | Yes | Unclear | Yes | Yes | Yes |
| **Lewis55, 2009** | Yes | Yes | Yes | Yes | Unclear | Yes | Yes | Yes |
| **Li54, 2012** | Yes | Yes | Yes | Yes | Unclear | Unclear | Yes | Yes |
| **López-Jornet47, 2011** | Yes | Yes | Yes | Unclear | Unclear | Unclear | Unclear | Yes |
| **Lyne21, 2015** | Yes | Yes | Yes | Yes | No | Unclear | Unclear | Yes |
| **Mahler41, 1986** | Yes | Yes | Yes | Yes | Yes | Yes | Yes | Yes |
| **Mascitt62, 2019** | Yes | Yes | Yes | Yes | Unclear | Yes | Unclear | Yes |
| **Mattsson48, 2011** | Yes | Yes | Yes | Yes | Unclear | Unclear | Yes | Yes |
| **Melo Filho31, 2012** | Yes | Yes | Yes | No | No | Unclear | Yes | Yes |
| **Meyerson4, 1995** | Yes | Yes | Yes | Unclear | Unclear | Yes | Yes | Yes |
| **Morrow30, 1998** | Yes | Yes | Yes | Yes | Unclear | Yes | Yes | Yes |
| **Nestor26, 2016** | Yes | Yes | Yes | Yes | Unclear | Unclear | Yes | Yes |
| **Odell27, 1995** | Yes | Yes | Yes | Unclear | Unclear | Unclear | Unclear | Yes |
| **Parvaei25, 2015** | Yes | Yes | Yes | Unclear | Unclear | Yes | Yes | Yes |
| **Patel23, 1998** | Yes | Yes | Yes | Yes | Unclear | Unclear | Yes | Yes |
| **Perusse20, 1991** | Yes | Yes | Yes | Yes | No | Unclear | Yes | Yes |
| **Resende24, 2012** | Yes | Yes | Yes | Yes | No | Unclear | Yes | Yes |
| **Roeker51, 2013** | Unclear | Yes | Yes | Yes | No | Unclear | Yes | No |
| **Romeo22, 2015** | Yes | Yes | Yes | Yes | Unclear | Unclear | Unclear | Yes |
| **Salman19, 1985** | Yes | Yes | Yes | Unclear | Yes | Unclear | Yes | Yes |
| **Siller17, 1994** | Yes | Yes | Yes | Yes | Yes | Unclear | Yes | Yes |
| **Singh53, 2007** | Yes | Yes | Yes | Yes | Unclear | Unclear | Unclear | Yes |
| **Song50, 2014** | Yes | Yes | Yes | Yes | Unclear | Yes | Yes | Yes |
| **Steele57, 2011** | Yes | Yes | Yes | Yes | Unclear | Yes | Yes | Yes |
| **Tosios18, 2017** | Yes | Yes | Yes | Yes | Yes | Yes | Unclear | Yes |
| **Treister15, 2004** | Yes | Yes | Yes | Unclear | Unclear | Unclear | Unclear | Yes |
| **Tullio49, 2018** | Yes | Yes | Yes | Yes | Unclear | Unclear | Unclear | Yes |
| **Vasudevan16, 2010** | Yes | Yes | Yes | Unclear | Yes | Yes | Unclear | Yes |
| **Watson42, 1974** | Yes | Yes | Yes | Unclear | Unclear | Unclear | Unclear | Yes |
| **Wong46, 2011** | Yes | Yes | Yes | Yes | Unclear | Unclear | Unclear | Yes |

**Supplementary table (3) shows quality assessment results for included cohort studies.**

| **Chacon-Dulcey60, 2020** | **Ozog28, 2000** | **Kumar11, 2001** | **Ficarra5, 1990** | **Acharya40, 2017** | **Study ID** |
| --- | --- | --- | --- | --- | --- |
| **Selection (max. 4 *)** | | | | | |
| * | * | * | * | * | Representativeness of the exposed cohort. |
|  |  |  | * | * | Selection of the non-exposed cohort. |
| * | * | * | * | * | Ascertainment of exposure. |
| * | * | * | * | * | Demonstration that outcome of interest was not present at start of study. |
| **Comparability (max. 2*)** | | | | | |
| * | * | * | * | * | Comparability of cohorts on the basis of the design or analysis. |
| **Outcome (max. 5 *)** | | | | | |
| * | * | * | * | * | Assessment of outcome. |
| * | * | * | * | * | Was follow-up long enough for outcomes to occur? |
|  | * | * | * | * | Adequacy of follow up of cohorts. |
| **6** | **7** | **7** | **8** | **8** | **Total** |

**Supplementary table (4) shows quality assessment results for included cross sectional studies.**

| **Oliveira59, 2019** | **Bahloul39, 2017** | **Study ID** |
| --- | --- | --- |
|  | **Selection (max. 5 *)** | |
| * | * | Representativeness of the sample. |
|  |  | Was sample size justified and satisfactory? |
| * | * | Response rate. |
|  |  | Validation of the measurement tool. |
|  | **Comparability (max. 2*)** | |
| ** | ** | Comparability of cases and controls with controlling confounding factors. |
|  | **Outcome (max. 3*)** | |
| ** | * | Assessment of outcome. |
| * | * | Statistical test. |
| 7 | 6 | **Total** |
